# Supplementary material for: Characterization of phenylalanine ammonia-lyase genes facilitating flavonoid biosynthesis from two species of medicinal plant Anoectochilus
Source: PeerJ. 2022 Jul 6;10:e13614. doi: 10.7717/peerj.13614 (PMC9270878; doi:10.7717/peerj.13614)
Supplement: Supplemental Information 9 — The molecular and functional characterization Phenylalanine ammonia-lyase and their expression analysis in relation to flavonoid constituents from two species of medicinal plant Anoectochilus. [file peerj-10-13614-s009.xlsx]

## Sheet: FIG.4
	the relatve expression level of leaf	the relatve expression level of root	the relatve expression level of stem	the relatve standard deviation of leaf	the relatve standard deviation of root	the relatve standard deviation of stem
Anoectochilus formosanus	1	0.10012	2.20801	0.13195	0.038736	0.504188
Anoectochilus roxburghii	0.0731091	0.892025	0.766745	0.00608456	0.0567986	0.0712997
											the relatve expression level (PAL/Actin2)	average	standard deviation	average/the average of leaf from Anoectochilus formosanus	standard deviation/the standard deviation of leaf from Anoectochilus formosanus	P value	P value
									Anoectochilus formosanus	leaf1	0.00349619	0.00385596	0.000508794	1	0.13195
									Anoectochilus formosanus	leaf2	0.00421574
									Anoectochilus formosanus	root1	0.000491678	0.000386061	0.000149365	0.10012	0.038736	0.00573806
									Anoectochilus formosanus	root2	0.000280444
									Anoectochilus formosanus	stem1	0.00988872	0.00851402	0.00194413	2.20801	0.504188	0.0409033		0.0137948
									Anoectochilus formosanus	stem2	0.00713931
									Anoectochilus roxburghii	leaf1	0.000265316	0.000281906	2.34618e-05	0.0731091	0.00608456		0.00500115
									Anoectochilus roxburghii	leaf2	0.000298496
									Anoectochilus roxburghii	root1	0.00359448	0.00343962	0.000219013	0.892025	0.0567986	0.00121202	0.00187367
									Anoectochilus roxburghii	root2	0.00328475
									Anoectochilus roxburghii	stem1	0.00315094	0.00295654	0.000274929	0.766745	0.0712997	0.0026397	0.0285584	0.0957004
									Anoectochilus roxburghii	stem2	0.00276214

## Sheet: FIG.5-A(PHE)
Relative expression level of the PAL gene under the PHE stress in A. formosanus and A. roxburghii.
TIME	0 h	0.5 h	1 h	2 h	4 h	8 h	12 h
the relatve expression level from Anoectochilus formosanus	1	0.179901	0.159343	0.420388	4.05091	0.14395	1.51991
the relatve expression level from Anoectochilus roxburghii	1	0.174562	0.159543	1.91757	0.0470426	0.243877	0.300546
the relatve standard deviation from Anoectochilus formosanus	0.024504	0.0978589	0.00546583	0.00206043	0.396459	0.0224852	0.390443
the relatve standard deviation from Anoectochilus roxburghii	0.359536	0.000855575	0.00390945	0.355095	0.00712028	0.133676	0.0469457

## Sheet: FIG.5-B(NACL)
Relative expression level of the PAL gene under the NACL stress in A. formosanus and A. roxburghii.
TMIE	0h	0.5h	1h	2h	4h	8h	12 h
the relatve expression level from Anoectochilus formosanus	1	0.659248	3.39632	15.2437	2.24839	1.68657	4.72632
the relatve expression level from Anoectochilus roxburghii	1	4.76896	2.21797	2.04579	1.17368	0.86865	0.355756
the relatve standard deviation from Anoectochilus formosanus	0.453682	0	0.0499372	0.896049	0	0.52054	2.12446
the relatve standard deviation from Anoectochilus roxburghii	0.0636737	0.0934903	0.0978064	0.147309	0.0976803	0.131477	0.0122033

## Sheet: FIG.5-C(UV)
Relative expression level of the PAL gene under the UV stress in A. formosanus and A. roxburghii.
TIME	0h	0.5h	1h	2h	4h	8h	12 h
the relatve expression level from Anoectochilus formosanus	1	2.18707	6.81288	12.706	11.0649	9.43024	54.4899
the relatve expression level from Anoectochilus roxburghii	1	165.858	91.6131	188.978	273.913	873.894	835.245
the relatve standard deviation from Anoectochilus formosanus	0.146511	0.299206	0.367133	0.311347	0.487932	0.138656	2.40286
the relatve standard deviation from Anoectochilus roxburghii	0.0832257	21.885	10.7518	21.2584	4.02744	89.7889	70.8852

## Sheet: FIG.5-D(RL)
Relative expression level of the PAL gene under the RL stress in A. formosanus and A. roxburghii.
TIME	0 h	0.5 h	1 h	2 h	4 h	8 h	12 h
the relatve expression level from Anoectochilus formosanus	1	0.390639	0.261853	0.299941	0.340805	0.650266	0.331443
the relatve expression level from Anoectochilus roxburghii	1	3.12273	0.0285093	0.130308	0.179675	1.24427	3.27632
the relatve standard deviation from Anoectochilus formosanus	0.000508794	3.69102e-05	0.000191837	0.000264094	0.000630912	0.000306471	0.000242819
the relatve standard deviation from Anoectochilus roxburghii	0.0832257	0.0918193	0.000419182	0.010845	0.0375896	0.109632	0.368558

## Sheet: FIG.7-A
Relative content of total flavonoids of T3 Arabidopsis lines of gene PAL from A. formosanus and A. roxburghii
	M	F-1	F-2	F-3	R-1	R-2
value1	0.185	0.162	0.195	0.176	0.198	0.185
value2	0.169	0.185	0.183	0.226	0.188	0.189
value3	0.177	0.176	0.206	0.168	0.225	0.206
average	0.177	0.174333	0.194667	0.19	0.203667	0.193333
the standard deviation	0.008	0.0115902	0.0115036	0.0314325	0.0191398	0.0111505
P value		0.379692	0.0471701	0.262878	0.0449789	0.0541375
Relative content of total flavonoids of T3 Arabidopsis lines of gene PAL from A. formosanus and A. roxburghii
	M	F-1	F-2	F-3	R-1	R-2
the relatve content of total flavonoids	1	0.984934	1.09981	1.07345	1.15066	1.09228
the relatve standard deviation	0.0451977	0.0654815	0.0649922	0.177585	0.108135	0.0629971

## Sheet: FIG.7-B
Relative content of anthocyanin of T3 Arabidopsis lines of gene PAL from A. formosanus and A. roxburghii
	M	F-1	F-2	F-3	R-1	R-2
value1	0.244	0.236	0.299	0.304	0.355	0.325
value2	0.258	0.271	0.335	0.371	0.331	0.381
value3	0.293	0.259	0.347	0.324	0.322	0.345
average	0.265	0.255333	0.327	0.333	0.336	0.350333
the standard deviation	0.0252389	0.0177858	0.02498	0.0343948	0.0170587	0.0283784
P value		0.308215	0.0195031	0.0254041	0.0078222	0.00883209
Relative content of anthocyanin of T3 Arabidopsis lines of gene PAL from A. formosanus and A. roxburghii
	M	F-1	F-2	F-3	R-1	R-2
the relatve content of total flavonoids	1	0.963522	1.23396	1.2566	1.26792	1.32201
the relatve standard deviation	0.095241	0.0671161	0.0942641	0.129792	0.0643725	0.107088
